# Supplementary material for: Chemical Composition and Biological Activities of the Leaf Essential Oils of Curcuma longa, Curcuma aromatica and Curcuma angustifolia
Source: MDPI journal article supplement (doi:10.3390/antibiotics11111547), 2022-11-03
Supplement: s1 [file s1]

**Supplementary Table S1.** The major compounds detected in the essential oil extracted from the leaves of *C. longa* (LEO) species by GC-MS analysis

| Peak no.                   | RT <sup>a</sup> | Component                        | RI <sup>b</sup> | RI <sup>c</sup> | %RA <sup>d</sup> |
|----------------------------|-----------------|----------------------------------|-----------------|-----------------|------------------|
| 1                          | 5.25            | $\alpha$ -pinene                 | 927             | 928             | 3.07             |
| 2                          | 5.56            | $\beta$ -pinene                  | 981             | 980             | 4.76             |
| 3                          | 6.41            | 3-carene                         | 1006            | 1004            | 2.10             |
| 4                          | 6.68            | $\alpha$ -phellandrene           | 1011            | 1010            | 31.27            |
| 5                          | 6.76            | o-cymene                         | 1029            | 1030            | 5.45             |
| 6                          | 6.85            | $\alpha$ -myrcene                | 1042            | 1042            | 3.41             |
| 7                          | 6.98            | $\alpha$ -ocimene                | 1047            | 1048            | 2.69             |
| 8                          | 7.10            | Eucalyptol                       | 1050            | 1052            | 13.54            |
| 9                          | 7.51            | cis-terpinene                    | 1063            | 1063            | 2.50             |
| 10                         | 8.00            | 2-carene                         | 1148            | 1168            | 21.73            |
| 11                         | 8.12            | 1,6-Octadien-3-ol, 3,7-dimethyl- | 1184            | 1185            | 1.29             |
| 12                         | 9.47            | Terpinen-4-ol                    | 1188            | 1197            | 0.49             |
| 13                         | 9.58            | Thymol                           | 1266            | 1212            | 0.78             |
| 14                         | 9.70            | $\alpha$ -terpineol              | 1201            | 1215            | 0.53             |
| 15                         | 12.07           | Exo-2-Hydroxycineole             | 1228            | 1229            | 0.33             |
| 16                         | 14.27           | Caryophyllene                    | 1407            | 1406            | 0.81             |
| 17                         | 15.75           | $\alpha$ -curcumene              | 1489            | 1475            | 0.88             |
| 18                         | 16.04           | Bisabolene                       | 1524            | 1520            | 0.58             |
| 19                         | 19.49           | Tumerone                         | 1634            | 1633            | 1.56             |
| 20                         | 20.19           | Curlone                          | 1655            | 1654            | 0.58             |
| 21                         | 22.34           | Alloaromadendrene oxide          | 1685            | 1676            | 0.39             |
| Total identified compounds |                 |                                  |                 |                 | 98.16 %          |

<sup>a</sup> Retention time; <sup>b</sup> Retention index (library); <sup>c</sup> Retention index (calculated); <sup>d</sup> Relative area

**Supplementary Table S2.** The major compounds detected in the essential oil extracted from the leaves of *C. aromatica* (REO) species by GC-MS analysis

| Peak no.                   | RT <sup>a</sup> | Component                 | RI <sup>b</sup> | RI <sup>c</sup> | %RA <sup>d</sup> |
|----------------------------|-----------------|---------------------------|-----------------|-----------------|------------------|
| 1                          | 5.56            | $\alpha$ -pinene          | 930             | 932             | 1.91             |
| 2                          | 5.80            | Camphene                  | 956             | 955             | 4.80             |
| 3                          | 6.40            | $\alpha$ -myrcene         | 983             | 981             | 1.64             |
| 4                          | 7.10            | Camphor                   | 1135            | 1134            | 19.82            |
| 5                          | 8.11            | Linalyl acetate           | 1139            | 1140            | 2.44             |
| 6                          | 8.93            | 2-bornanone               | 1144            | 1145            | 12.25            |
| 7                          | 9.01            | Eucalyptol                | 1160            | 1151            | 2.47             |
| 8                          | 9.15            | Isoborneol                | 1154            | 1153            | 4.56             |
| 9                          | 9.30            | endo-Borneol              | 1162            | 1162            | 3.11             |
| 10                         | 9.47            | Terpinen-4-ol             | 1188            | 1169            | 0.89             |
| 11                         | 9.69            | $\alpha$ -terpineol       | 1179            | 1178            | 2.11             |
| 12                         | 13.61           | Humulene                  | 1146            | 1146            | 1.94             |
| 13                         | 14.98           | cis- $\alpha$ -bisabolene | 1498            | 1366            | 0.88             |
| 14                         | 15.84           | $\alpha$ -copaene         | 1378            | 1375            | 2.36             |
| 15                         | 17.21           | cis-elemene               | 1441            | 1440            | 1.11             |
| 16                         | 17.83           | $\alpha$ -guaiene         | 1459            | 1458            | 0.95             |
| 17                         | 18.70           | Spathulenol               | 1572            | 1570            | 1.14             |
| 18                         | 19.76           | Isoaromadendrene epoxide  | 1584            | 1580            | 2.43             |
| 19                         | 20.15           | Elemenone                 | 1580            | 1582            | 4.46             |
| 20                         | 20.59           | Curdione                  | 1679            | 1680            | 15.31            |
| 21                         | 21.32           | Neocurdione               | 1681            | 1682            | 3.07             |
| 22                         | 22.14           | 1-heptatriacotanol        | 1683            | 1688            | 4.70             |
| 23                         | 23.03           | Aromadendrene oxide-(2)   | 1685            | 1691            | 0.76             |
| Total identified compounds |                 |                           |                 |                 | 95.31 %          |

<sup>a</sup> Retention time; <sup>b</sup> Retention index (library); <sup>c</sup> Retention index (calculated); <sup>d</sup> Relative area

**Supplementary Table S3.** The major compounds detected in the essential oil extracted from the leaves of *C. angustifolia* (NEO) species by GC-MS analysis

| Peak no.                   | RT <sup>a</sup> | Component                   | RI <sup>b</sup> | RI <sup>c</sup> | %RA <sup>d</sup> |
|----------------------------|-----------------|-----------------------------|-----------------|-----------------|------------------|
| 1                          | 5.56            | $\alpha$ -pinene            | 930             | 933             | 2.31             |
| 2                          | 5.80            | camphene                    | 956             | 952             | 1.57             |
| 3                          | 7.09            | Eucalyptol                  | 1027            | 1029            | 11.58            |
| 4                          | 8.93            | 2-Bornanone                 | 1144            | 1146            | 2.33             |
| 5                          | 9.70            | $\alpha$ -terpineol         | 1179            | 1178            | 1.13             |
| 6                          | 13.53           | $\alpha$ -bourbonene        | 1411            | 1410            | 1.88             |
| 7                          | 13.62           | $\alpha$ -curcumene         | 1470            | 1462            | 5.12             |
| 8                          | 14.27           | Caryophyllene               | 1464            | 1465            | 1.17             |
| 9                          | 14.85           | cis- $\alpha$ -farnesene    | 1495            | 1496            | 0.87             |
| 10                         | 15.49           | Curzerenone                 | 1499            | 1488            | 25.32            |
| 11                         | 17.02           | $\alpha$ -acorenil          | 1628            | 1552            | 0.89             |
| 12                         | 17.21           | $\beta$ -elemene            | 1438            | 1555            | 1.40             |
| 13                         | 17.78           | Caryophyllene oxide         | 1582            | 1570            | 3.60             |
| 14                         | 18.15           | Boldenone                   | 1570            | 1574            | 6.45             |
| 15                         | 18.71           | Spathulenol                 | 1576            | 1577            | 1.41             |
| 16                         | 20.17           | $\alpha$ -elemenone         | 1670            | 1670            | 13.59            |
| 17                         | 21.20           | Longiverbenone              | 1676            | 1678            | 9.37             |
| 18                         | 21.63           | Alloaromadendrene oxide-(2) | 1685            | 1687            | 3.99             |
| Total identified compounds |                 |                             |                 |                 | 93.98 %          |

<sup>a</sup> Retention time; <sup>b</sup> Retention index (library); <sup>c</sup> Retention index (calculated); <sup>d</sup> Relative area

**Supplementary Table S4.** Statistical comparison of the antioxidant activities among different essential oils

| <b>Tukey's multiple comparisons test</b> | <b>Mean Diff.</b> | <b>95.00% CI of diff.</b> | <b>Significant ?</b> | <b>Summary</b> | <b>Adjusted P Value</b> |
|------------------------------------------|-------------------|---------------------------|----------------------|----------------|-------------------------|
| <b>DPPH radical scavenging</b>           |                   |                           |                      |                |                         |
| LEO vs. REO                              | -6.61             | -7.307 to -5.913          | Yes                  | ****           | <0.0001                 |
| LEO vs. NEO                              | -7.46             | -8.157 to -6.763          | Yes                  | ****           | <0.0001                 |
| LEO vs. Ascorbic acid                    | -1.1              | -1.797 to -0.4034         | Yes                  | **             | 0.0011                  |
| REO vs. NEO                              | -0.85             | -1.547 to -0.1534         | Yes                  | *              | 0.0128                  |
| REO vs. Ascorbic acid                    | 5.51              | 4.813 to 6.207            | Yes                  | ****           | <0.0001                 |
| NEO vs. Ascorbic acid                    | 6.36              | 5.663 to 7.057            | Yes                  | ****           | <0.0001                 |
| <b>ABTS radical scavenging</b>           |                   |                           |                      |                |                         |
| LEO vs. REO                              | -4.07             | -4.767 to -3.373          | Yes                  | ****           | <0.0001                 |
| LEO vs. NEO                              | -3.6              | -4.297 to -2.903          | Yes                  | ****           | <0.0001                 |
| LEO vs. Ascorbic acid                    | -1.76             | -2.457 to -1.063          | Yes                  | ****           | <0.0001                 |
| REO vs. NEO                              | 0.47              | -0.2266 to 1.167          | No                   | ns             | 0.2709                  |
| REO vs. Ascorbic acid                    | 2.31              | 1.613 to 3.007            | Yes                  | ****           | <0.0001                 |
| NEO vs. Ascorbic acid                    | 1.84              | 1.143 to 2.537            | Yes                  | ****           | <0.0001                 |
| <b>H2O2 radical scavenging</b>           |                   |                           |                      |                |                         |
| LEO vs. REO                              | -4.03             | -4.727 to -3.333          | Yes                  | ****           | <0.0001                 |
| LEO vs. NEO                              | -3.73             | -4.427 to -3.033          | Yes                  | ****           | <0.0001                 |
| LEO vs. Ascorbic acid                    | -11.2             | -11.9 to -10.5            | Yes                  | ****           | <0.0001                 |
| REO vs. NEO                              | 0.3               | -0.3966 to 0.9966         | No                   | ns             | 0.6401                  |
| REO vs. Ascorbic acid                    | -7.17             | -7.867 to -6.473          | Yes                  | ****           | <0.0001                 |
| NEO vs. Ascorbic acid                    | -7.47             | -8.167 to -6.773          | Yes                  | ****           | <0.0001                 |

**Supplementary Table S5.** Statistical comparison of the cytotoxic activities among different essential oils and the standard drug cyclophosphamide

Tukey's multiple comparisons test   Mean Diff.   95.00% CI of diff.   Adjusted P Value

**MCF7**

|                          |        |                  |         |
|--------------------------|--------|------------------|---------|
| LEO vs. REO              | -15.01 | -17.91 to -12.11 | <0.0001 |
| LEO vs. NEO              | -23.43 | -26.33 to -20.53 | <0.0001 |
| LEO vs. Cyclophosphamide | 31.28  | 28.38 to 34.18   | <0.0001 |
| REO vs. NEO              | -8.42  | -11.32 to -5.517 | <0.0001 |
| REO vs. Cyclophosphamide | 46.29  | 43.39 to 49.19   | <0.0001 |
| NEO vs. Cyclophosphamide | 54.71  | 51.81 to 57.61   | <0.0001 |

**MDA-MB-231**

|                          |        |                   |         |
|--------------------------|--------|-------------------|---------|
| LEO vs. REO              | -21.94 | -24.84 to -19.04  | <0.0001 |
| LEO vs. NEO              | -25.14 | -28.04 to -22.24  | <0.0001 |
| LEO vs. Cyclophosphamide | 36.65  | 33.75 to 39.55    | <0.0001 |
| REO vs. NEO              | -3.2   | -6.103 to -0.2975 | 0.0258  |
| REO vs. Cyclophosphamide | 58.59  | 55.69 to 61.49    | <0.0001 |
| NEO vs. Cyclophosphamide | 61.79  | 58.89 to 64.69    | <0.0001 |

**Supplementary Table S6.** Statistical comparison of the antibacterial activities among different essential oils and gentamicin

| Tukey's multiple comparisons test | Mean Diff. | 95.00% CI of diff. | Adjusted P Value |
|-----------------------------------|------------|--------------------|------------------|
| <i>Escherichia coli</i>           |            |                    |                  |
| LEO vs. REO                       | 1.5        | 1.105 to 1.895     | <0.0001          |
| LEO vs. NEO                       | 3.1        | 2.705 to 3.495     | <0.0001          |
| LEO vs. Gentamicin                | -1.8       | -2.195 to -1.405   | <0.0001          |
| REO vs. NEO                       | 1.6        | 1.205 to 1.995     | <0.0001          |
| REO vs. Gentamicin                | -3.3       | -3.695 to -2.905   | <0.0001          |
| NEO vs. Gentamicin                | -4.9       | -5.295 to -4.505   | <0.0001          |
| <i>Pseudomonas aeruginosa</i>     |            |                    |                  |
| LEO vs. REO                       | 4.2        | 3.805 to 4.595     | <0.0001          |
| LEO vs. NEO                       | 5.4        | 5.005 to 5.795     | <0.0001          |
| LEO vs. Gentamicin                | 2.5        | 2.105 to 2.895     | <0.0001          |
| REO vs. NEO                       | 1.2        | 0.8046 to 1.595    | <0.0001          |
| REO vs. Gentamicin                | -1.7       | -2.095 to -1.305   | <0.0001          |
| NEO vs. Gentamicin                | -2.9       | -3.295 to -2.505   | <0.0001          |
| <i>Staphylococcus aureus</i>      |            |                    |                  |
| LEO vs. REO                       | 4.1        | 3.705 to 4.495     | <0.0001          |
| LEO vs. NEO                       | 4.3        | 3.905 to 4.695     | <0.0001          |
| LEO vs. Gentamicin                | -2.1       | -2.495 to -1.705   | <0.0001          |
| REO vs. NEO                       | 0.2        | -0.1954 to 0.5954  | 0.5485           |
| REO vs. Gentamicin                | -6.2       | -6.595 to -5.805   | <0.0001          |
| NEO vs. Gentamicin                | -6.4       | -6.795 to -6.005   | <0.0001          |
| <i>Salmonella enterica</i>        |            |                    |                  |
| LEO vs. REO                       | 1.5        | 1.105 to 1.895     | <0.0001          |
| LEO vs. NEO                       | 2.1        | 1.705 to 2.495     | <0.0001          |
| LEO vs. Gentamicin                | -1.5       | -1.895 to -1.105   | <0.0001          |
| REO vs. NEO                       | 0.6        | 0.2046 to 0.9954   | 0.0008           |
| REO vs. Gentamicin                | -3         | -3.395 to -2.605   | <0.0001          |
| NEO vs. Gentamicin                | -3.6       | -3.995 to -3.205   | <0.0001          |

**Supplementary Table S7.** Statistical comparison of the antibacterial activities in terms of minimum inhibitory concentration among different essential oils and gentamicin

| Tukey's multiple comparisons test | Mean Diff. | 95.00% CI of diff.  | Adjusted P Value |
|-----------------------------------|------------|---------------------|------------------|
| <i>Escherichia coli</i>           |            |                     |                  |
| LEO vs. REO                       | -0.37      | -0.4026 to -0.3374  | <0.0001          |
| LEO vs. NEO                       | -0.37      | -0.4026 to -0.3374  | <0.0001          |
| LEO vs. Gentamicin                | 0.6        | 0.5674 to 0.6326    | <0.0001          |
| REO vs. NEO                       | 0          | -0.03258 to 0.03258 | >0.9999          |
| REO vs. Gentamicin                | 0.97       | 0.9374 to 1.003     | <0.0001          |
| NEO vs. Gentamicin                | 0.97       | 0.9374 to 1.003     | <0.0001          |
| <i>Pseudomonas aeruginosa</i>     |            |                     |                  |
| LEO vs. REO                       | 0          | -0.03258 to 0.03258 | >0.9999          |
| LEO vs. NEO                       | -0.12      | -0.1526 to -0.08742 | <0.0001          |
| LEO vs. Gentamicin                | 0.6        | 0.5674 to 0.6326    | <0.0001          |
| REO vs. NEO                       | -0.12      | -0.1526 to -0.08742 | <0.0001          |
| REO vs. Gentamicin                | 0.6        | 0.5674 to 0.6326    | <0.0001          |
| NEO vs. Gentamicin                | 0.72       | 0.6874 to 0.7526    | <0.0001          |
| <i>Staphylococcus aureus</i>      |            |                     |                  |
| LEO vs. REO                       | -0.25      | -0.2826 to -0.2174  | <0.0001          |
| LEO vs. NEO                       | -0.5       | -0.5326 to -0.4674  | <0.0001          |
| LEO vs. Gentamicin                | 0.44       | 0.4074 to 0.4726    | <0.0001          |
| REO vs. NEO                       | -0.25      | -0.2826 to -0.2174  | <0.0001          |
| REO vs. Gentamicin                | 0.69       | 0.6574 to 0.7226    | <0.0001          |
| NEO vs. Gentamicin                | 0.94       | 0.9074 to 0.9726    | <0.0001          |
| <i>Salmonella enterica</i>        |            |                     |                  |
| LEO vs. REO                       | -0.62      | -0.6526 to -0.5874  | <0.0001          |
| LEO vs. NEO                       | -0.62      | -0.6526 to -0.5874  | <0.0001          |
| LEO vs. Gentamicin                | 0.6        | 0.5674 to 0.6326    | <0.0001          |
| REO vs. NEO                       | 0          | -0.03258 to 0.03258 | >0.9999          |
| REO vs. Gentamicin                | 1.22       | 1.187 to 1.253      | <0.0001          |
| NEO vs. Gentamicin                | 1.22       | 1.187 to 1.253      | <0.0001          |
